# Supplementary material for: Activity of faujasite supported gold monomer towards water gas shift reaction: hybrid density functional theory/molecular mechanics approach
Source: Royal Society of Chemistry journal article supplement (doi:10.1039/c5ra13962g), 2015-01-01
Supplement: c5ra13962g1.pdf [file c5ra13962g1.pdf]

*Supporting Information*

**Activity of Faujasite Supported Gold Monomer towards Water Gas Shift**

**Reaction: Hybrid Density Functional Theory/Molecular Mechanics**

**Approach**

Subhi Baishya and Ramesh C. Deka

*Department of Chemical Sciences, Tezpur University, Napaam-784028, Assam, India*

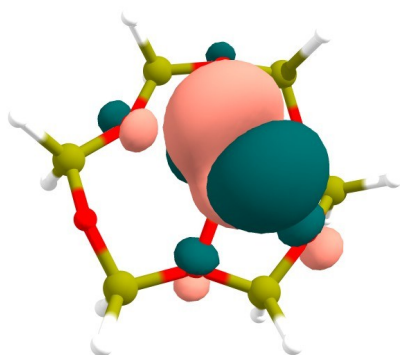

(a)  $\text{Au}^0/\text{FAU}$ , HOMO-2

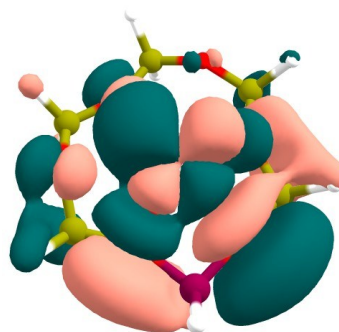

(b)  $\text{Au}^+/\text{FAU}$ , HOMO-1

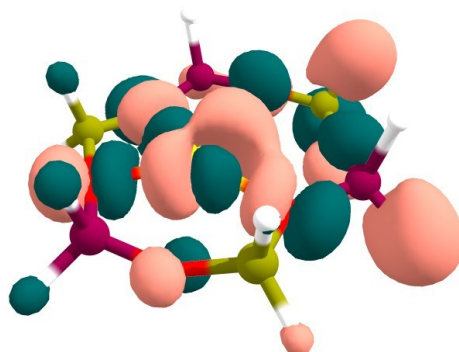

(c)  $\text{Au}^{3+}/\text{FAU}$ , HOMO-2

**Figure S1:** Frontier orbitals illustrating the interaction between Au and the zeolite O atoms in  $\text{Au}^n/\text{FAU}$ ,  $n=0, +1$  and  $+3$ .

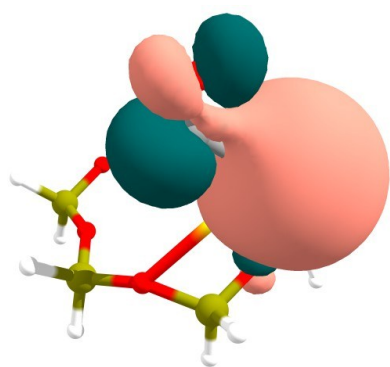

(a)  $\text{Au}^0\text{-CO/FAU}$ , HOMO

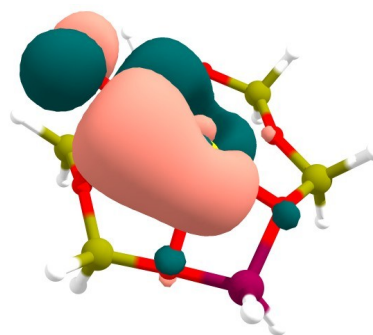

(b)  $\text{Au}^+\text{-CO/FAU}$ , LUMO

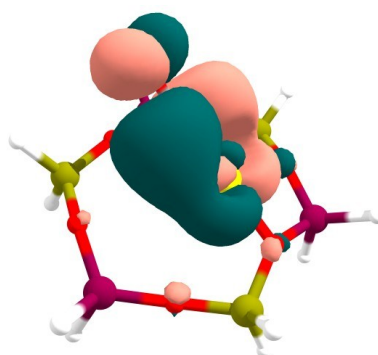

(c)  $\text{Au}^{3+}\text{-CO/FAU}$ , LUMO+1

**Figure S2:** Frontier orbitals illustrating the interaction between CO and the faujasite supported Au centre in the CO adsorbed complexes of  $\text{Au}^n/\text{FAU}$ ,  $n=0$ ,  $+1$  and  $+3$ .

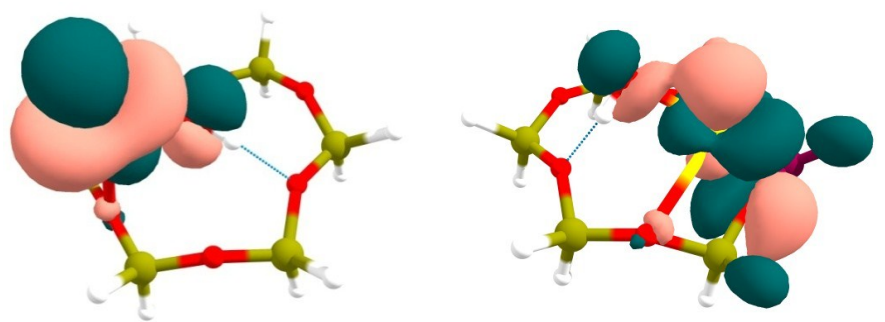

(a) Au<sup>0</sup>-H<sub>2</sub>O/FAU, HOMO-3

(b) Au<sup>+</sup>-H<sub>2</sub>O/FAU, HOMO-2

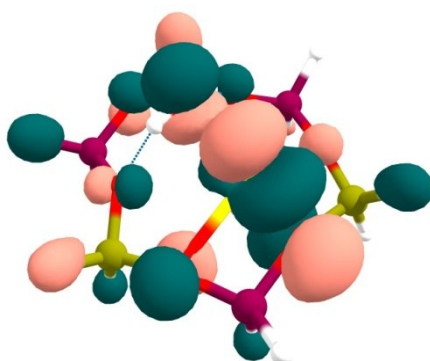

(c) Au<sup>3+</sup>-H<sub>2</sub>O/FAU, HOMO-4

**Figure S3:** Frontier orbitals illustrating the interaction between H<sub>2</sub>O and the faujasite supported Au centre in the H<sub>2</sub>O adsorbed complexes of Au<sup>n</sup>/FAU, n=0, +1 and +3.

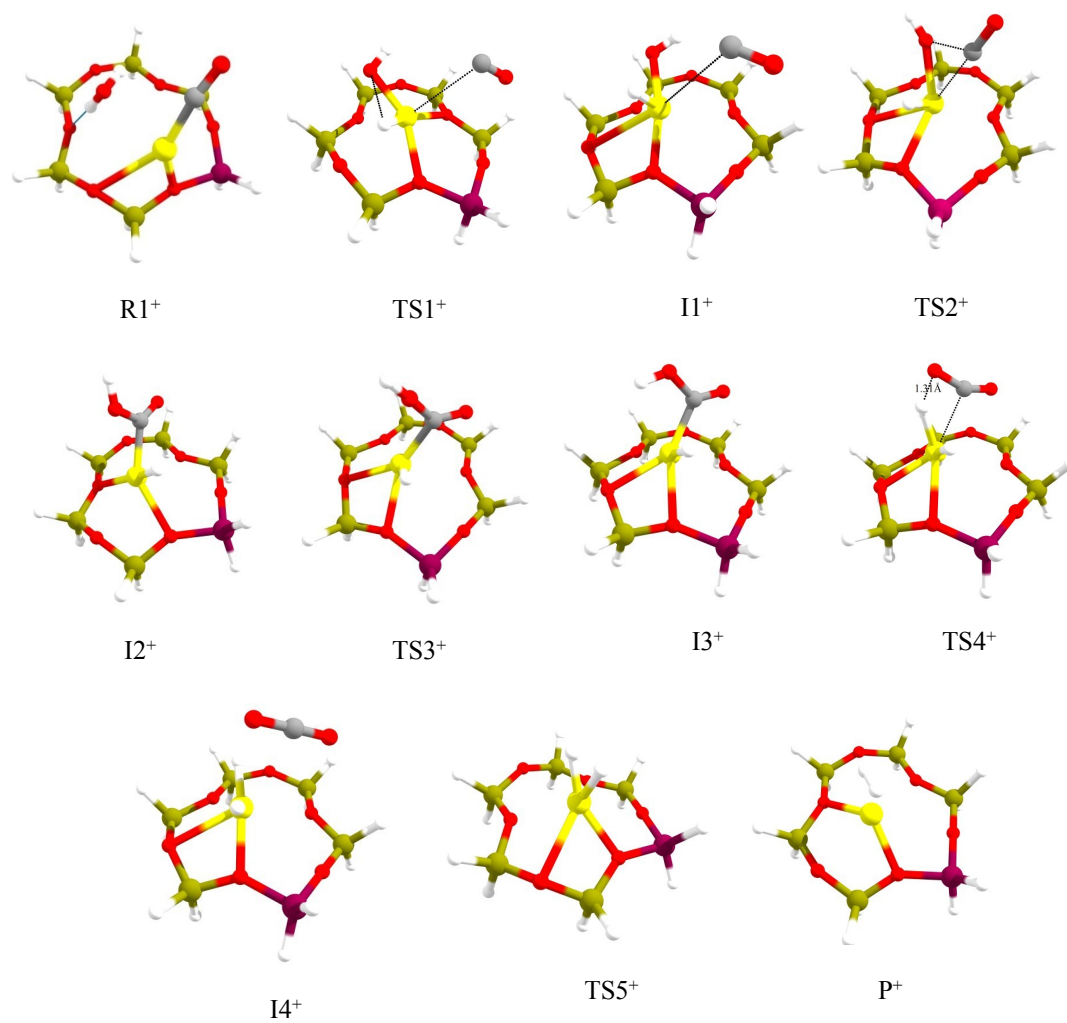

**Figure S4:** Structures of various intermediates and transition states observed during the reaction on Au<sup>+</sup>/FAU.

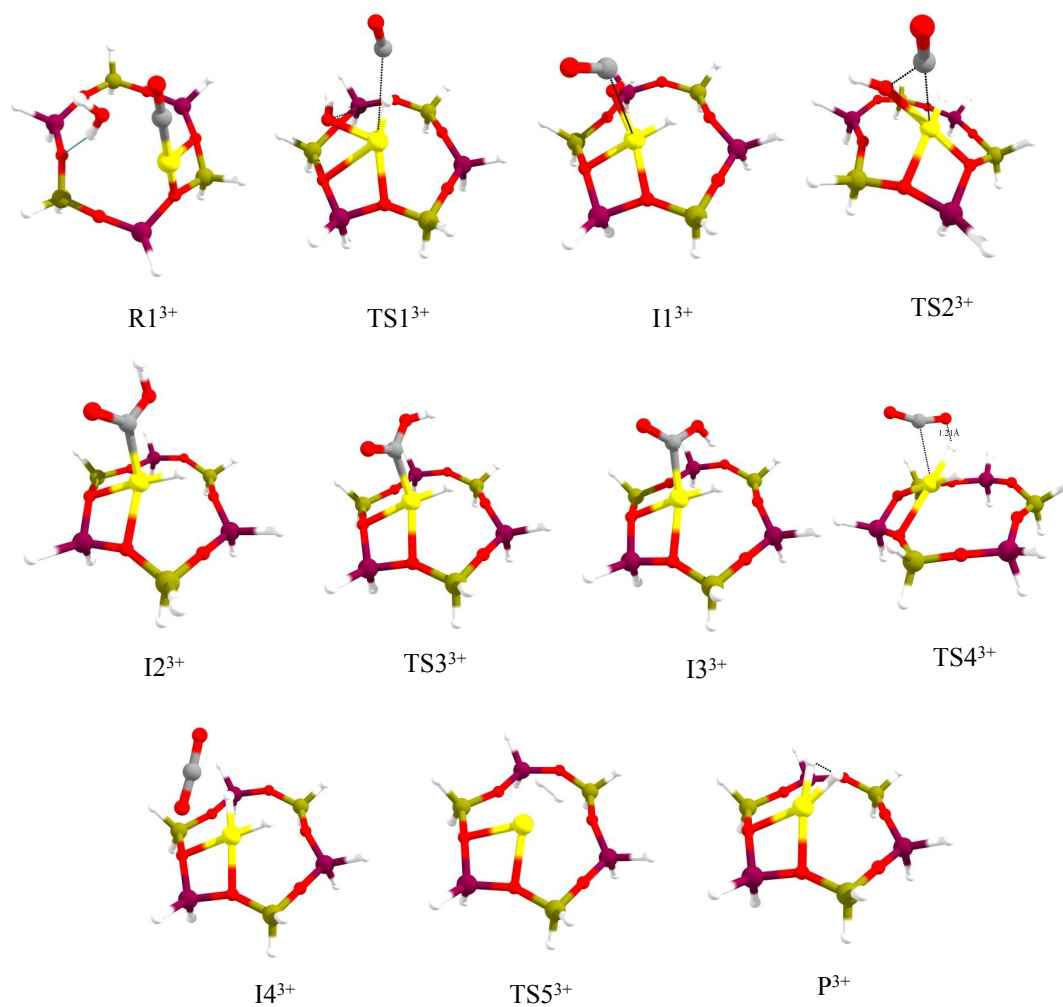

**Figure S5:** Structures of various intermediates and transition states observed during the reaction on Au<sup>3+</sup>/FAU.
